# Supplementary material for: Ante-mortem and Post-mortem Inspection and Relationship between Findings in a North Albanian Pig Slaughterhouse
Source: MDPI journal article supplement (doi:10.3390/ani13061032), 2023-03-12
Supplement: s1 [file s1]

**Table S1.** Prevalence of recorded *ante mortem* conditions and/or lesions in slaughtered pigs (N=3,930 pigs).

| Condition/lesion | No. of pigs | Prevalence |
|------------------|-------------|------------|
| Tail lesions     | 353         | 8.98       |
| Dyspnea          | 352         | 8.96       |
| Skin lesions     | 344         | 8.75       |
| Ear lesions      | 329         | 8.37       |
| Hematoma         | 119         | 3.03       |
| Abscess          | 51          | 1.30       |
| Anemia           | 41          | 1.04       |
| Hernia           | 39          | 0.99       |
| Lameness         | 38          | 0.97       |
| Cachexia         | 31          | 0.79       |
| Erysipelas       | 28          | 0.71       |
| Dead-on-arrival  | 22          | 0.56       |
| Dead in box      | 6           | 0.15       |

**Table S2.** Prevalence of recorded *post mortem* lesions in slaughtered pigs (N = 3,930 pigs).

| Lesion                    | No. of pigs | Prevalence |
|---------------------------|-------------|------------|
| Pleuritis                 | 388         | 9.87       |
| Pneumonia                 | 336         | 8.55       |
| Liver alterations         | 213         | 5.42       |
| White spot liver          | 148         | 3.77       |
| Pericarditis              | 119         | 3.03       |
| Hematoma                  | 119         | 3.03       |
| Splenomegaly              | 46          | 1.17       |
| Hernia                    | 39          | 0.99       |
| Abscess                   | 28          | 0.71       |
| Arthritis                 | 21          | 0.53       |
| Jaundice                  | 16          | 0.41       |
| Enteritis                 | 10          | 0.25       |
| Insufficient bleeding     | 6           | 0.15       |
| Peritonitis               | 3           | 0.08       |
| Generalized lymphadenitis | 0           | -          |
